# Supplementary material
Source: publisher site journal article supplement (https://neobiota.pensoft.net/article/39463/download/suppl/31/)
Supplement: Supplementary file 1

**Supplementary Table 1.** Ant species (or species group), number of records and status of ants identified from interception records to Australia from 1986-2010. Status corresponds to a species’ known occurrence in Australia based on the following categories: *endemic* - range is only known to occur within Australia; *native* - species whose native range includes Australia; *introduced* - species that now occur in Australia but whose native range is outside of Australia; *not established* - species whose native range is outside of Australia and are not known to have established populations in Australia. This information was determined using databases and literature of species and genera known to occur in Australia (e.g. Anderson 1991, Shattuck 1999, Anderson 2000, antweb.org, antwiki.org).

**Genus Species Records Status**

*Anochetus graeffei* 1 Native

*Anoplolepis custodiens* 1 Not Established

*Anoplolepis gracilipes* 267 Introduced

*Aphaenogaster pythia* 1 Endemic

*Arnoldius darwiniana*  2 Native

*Atta laevigata* 1 Not Established

*Brachymyrmex patagonicus* 1 Not Established

*Camponotus chalceus* 2 Endemic

*Camponotus compressus* 1 Not Established

*Camponotus consobrinus* 29 Endemic

*Camponotus dorycus* 2 Endemic

*Camponotus gasseri*  1 Endemic

*Camponotus humilior* 9 Endemic

*Camponotus inflatus* 1 Endemic

*Camponotus innexus* 1 Endemic

*Camponotus maculatus* group 1 Not Established

*Camponotus modoc*  16 Not Established

*Camponotus navigator* 1 Not Established

*Camponotus nearcticus* 1 Not Established

*Camponotus nigroaeneus* group 1 Endemic

*Camponotus novaehollandiae* 28 Native

*Camponotus pennsylvanicus* 63 Not Established

*Camponotus variegatus* group 1 Not Established

*Cardiocondyla emeryi*  1 Introduced

*Cataulacus intrudens* 1 Not Established

*Cephalotes maculatus* 1 Not Established

*Crematogaster ashmeadi* 1 Not Established

*Crematogaster laeviceps* 2 Endemic

*Crematogaster perengueyi* 2 Not Established

*Crematogaster scutellaris*  1 Not Established

*Dolichoderus thoracicus* 1 Not Established

*Iridomyrmex anceps*  6 Native

*Iridomyrmex bicknelli* 4 Endemic

*Iridomyrmex chasei*  14 Endemic

*Iridomyrmex gracilis* group 1 Endemic

*Iridomyrmex pallidus* 1 Native

*Iridomyrmex pallidus* group 2 Native

*Iridomyrmex purpureus* 49 Endemic

*Iridomyrmex purpureus* group 85 Endemic

*Iridomyrmex rufoniger* 9 Endemic

*Iridomyrmex sanguineus* 1 Native

*Iridomyrmex splendens* 1 Endemic

*Lepisiota capensis* 1 Not Established

*Linepithema humile*  171 Introduced

*Monomorium antarcticum*  2 Not Established

*Monomorium floricola* 55 Introduced

*Monomorium laeve* group 2 Endemic

*Monomorium minimum* 1 Not Established

*Monomorium pharaonis* 524 Introduced

*Monomorium rothsteini* group 4 Endemic

*Monomorium salomonis* group 2 Not Established

*Myrmecia erecta*  1 Endemic

*Myrmica rubra* 1 Not Established

*Myrmica sabuleti* 1 Not Established

*Myrmecia vindex*  1 Endemic

*Nylanderia obscura* 15 Native

*Nylanderia vaga*  50 Introduced

*Ochetellus glaber*  94 Native

*Ochetellus glaber* group 1 Native

*Odontomachus brunneus* 1 Not Established

*Odontomachus ruficeps* 1 Endemic

*Odontomachus turneri*  2 Endemic

*Oecophylla longinoda* 2 Not Established

*Oecophylla smaragdina* 44 Native

*Opisthopsis haddoni* 4 Endemic

*Opisthopsis rufithorax* 5 Endemic

*Paraparatrechina minutula* 2 Native

*Paratrechina longicornis* 802 Introduced

*Pheidole ampla*  1 Endemic

*Pheidole antipodum* 2 Endemic

*Pheidole bicarinata* 1 Not Established

*Pheidole fervens*  3 Not Established

*Pheidole impressiceps* 7 Endemic

*Pheidole megacephala* 386 Introduced

*Pheidolegeton diversus* 1 Not Established

*Plagiolepis alluaudi* 2 Not Established

*Polyrhachis appendiculata*  1 Endemic

*Polyrhachis australis* 1 Endemic

*Polyrhachis bicolor*  1 Native

*Polyrhachis dives* 3 Native

*Polyrhachis inconspicua* 1 Endemic

*Polyrhachis ornata*  3 Endemic

*Polyrhachis phryne*  1 Endemic

*Polyrhachis rastellata* 1 Native

*Polyrhachis viehmeyeri*  1 Not Established

*Rhytidoponera metallica* 21 Endemic

*Rhytidoponera reticulata* 1 Endemic

*Solenopsis geminata* 113 Introduced

*Solenopsis geminata* group 7 Introduced

*Solenopsis invicta*  6 Introduced

*Tapinoma melanocephalum* 359 Introduced

*Tapinoma minutum* 5 Native

*Tapinoma sessile* 1 Not Established

*Technomyrmex albipes*  97 Introduced

*Technomyrmex sophiae* 2 Endemic

*Tetramorium bicarinatum* 29 Introduced

*Tetramorium lanuginosum* 6 Native

*Tetramorium pacificum* 1 Native

*Tetramorium pacificum* group 1 Native

*Tetramorium simillium* 3 Introduced

*Tetramorium tonganum* 1 Not Established

*Tetraponera punctulata* 1 Endemic

*Trichomyrmex * destructor* 263 Introduced

*Wasmannia auropunctata* 23 Introduced

*formerly *Monomorium*
